# Supplementary material for: TUSC8 inhibits the development of osteosarcoma by sponging miR-197-3p and targeting EHD2
Source: PubMed Central journal article supplement — Int J Mol Med. 2020 Jul 27;46(4):1311–20. doi: 10.3892/ijmm.2020.4684 (PMC7447318; doi:10.3892/ijmm.2020.4684), 2020-07-27
Supplement: Supplementary_Data.pdf [file Supplementary_Data.pdf]

Figure S1. Effects of miR-197-3p inhibitor on OS cell proliferation, migration and invasion. (A) The expression of miR-197-3p was decreased by transfection of miR-197-3p inhibitor in MG-63 and U2OS cells. (B) CCK-8 assay was applied to assess the effect of miR-197-3p inhibitor on OS cell proliferation. (C and D) Cell migration and invasion were detected by Transwell assays in miR-197-3p inhibitor-transfected MG-63 and U2OS cells. \*P<0.05 vs. NC inhibitor.

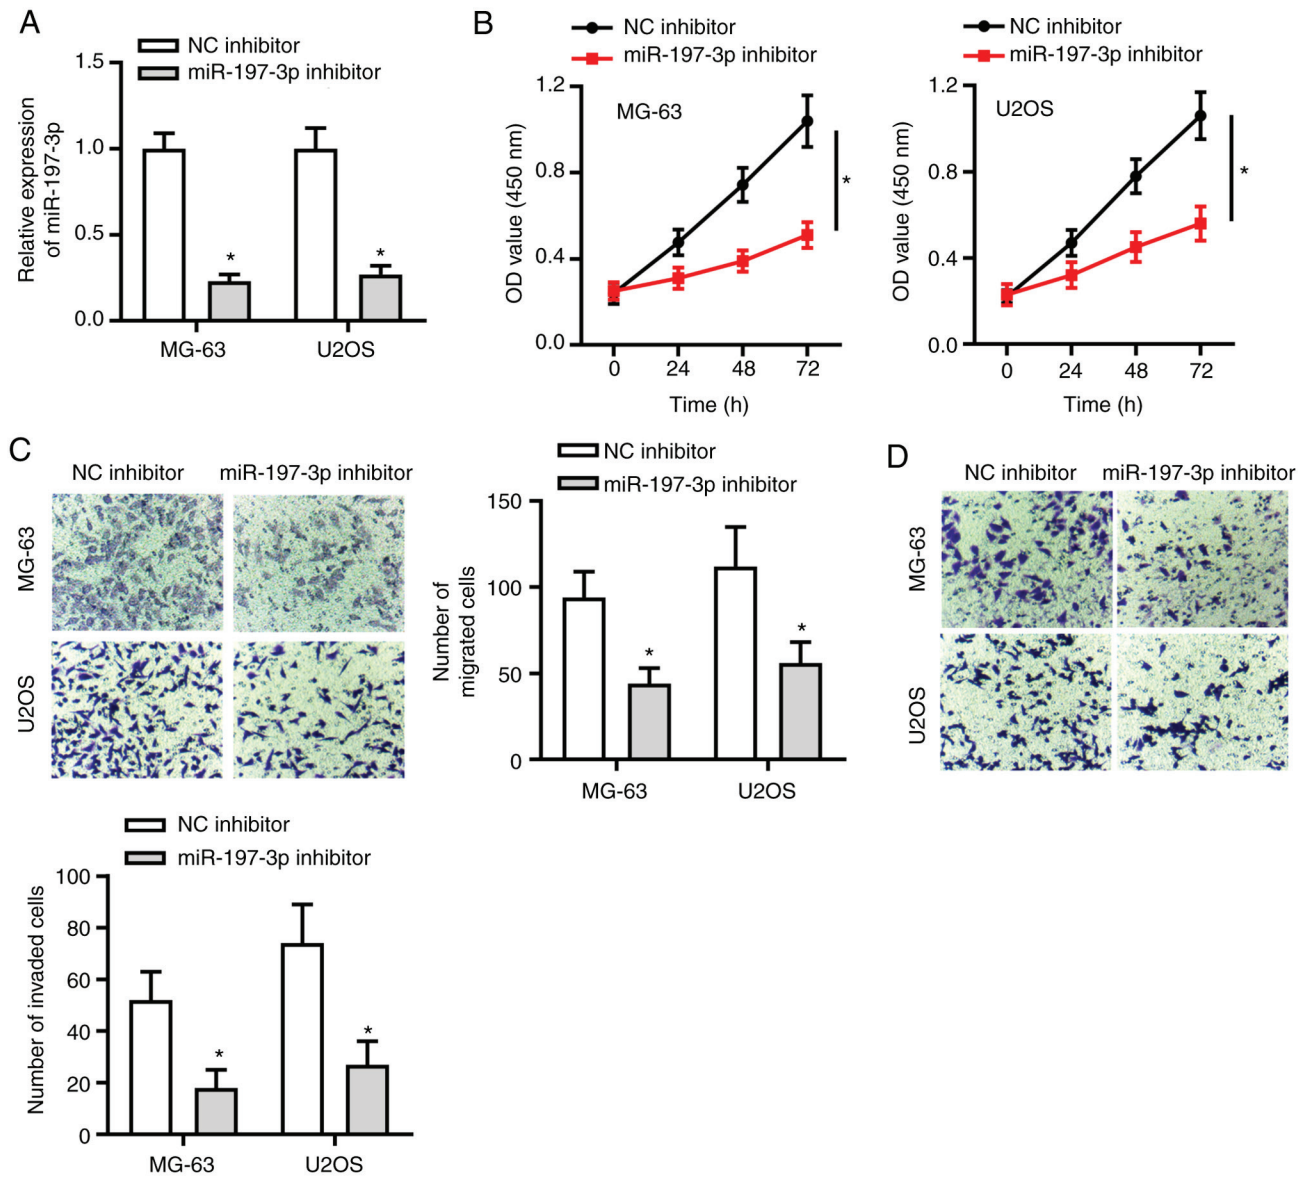

Table SI. Primer sequences used for RT-qPCR analysis.

| Name                  | Sequence (5'-3')                |
|-----------------------|---------------------------------|
| TUSC8 (forward)       | CTGCGGAGGTATGTCTAATTG           |
| TUSC8 (reverse)       | GTCAGGGACAGATGAGAGAA            |
| miR-197-3p (forward)  | ACACTCCAGCTGGGTTCCACCACCTTCTCCA |
| miR-197-3p (reverse)  | TCGTGGAGTCGGCAATTCAGTTGAGGCT    |
| miR-499b-5p (forward) | AGCAGAAAGTACACATAAACACA         |
| miR-499b-5p (reverse) | AGAGTTCTGCCACTATGTTTCA          |
| EHD2 (forward)        | CACCATGTTTCAGCTGGC              |
| EHD2 (reverse)        | GTGTGTGAGCCGGAGCAG              |
| DPP8 (forward)        | CCAGATGGACCTCATTGAGACAG         |
| DPP8 (reverse)        | GGTTGTTGCGTAAATCCTTGTGG         |
| TNFSF10 (forward)     | GAGTATGAACAGCCCCT               |
| TNFSF10 (reverse)     | GTTGCTTCTTCCTCTGGT              |
| GNE (forward)         | GATGCTGACACCCAAGACAA            |
| GNE (reverse)         | TCACAGGAGGAAAGCAGAAT            |
| KAT5 (forward)        | GGGGAGATAATCGAGGGCTG            |
| KAT5 (reverse)        | CCACTCATCTTCGTTGTCCTG           |
| SMCR8 (forward)       | GGCAAGCCTCACAGTACCAT            |
| SMCR8 (reverse)       | GAAGCGGATGGCTCCTTCAT            |
| GAPDH (forward)       | CAACAGCCTCAAGATCATC             |
| GAPDH (reverse)       | ACCAGGAAATGAGCTTGAC             |
| U6 (forward)          | GCTTCGGCAGCACATATACTAAAAT       |
| U6 (reverse)          | CGCTTCACGAATTTGCGTGTTCAT        |
